# Supplementary material for: Transient O2 pulses direct Fe crystallinity and Fe(III)-reducer gene expression within a soil microbiome
Source: Microbiome. 2018 Oct 23;6:189. doi: 10.1186/s40168-018-0574-5 (PMC6199725; doi:10.1186/s40168-018-0574-5)
Supplement: Supplementary file 2 — Table S1. Gives an accounting of sequence reads through processing, reference searching, and binning. (XLSX 45 kb) [file 40168_2018_574_MOESM2_ESM.xlsx]

## Sheet: Sheet1
SI Table S1 Read Accounting
													MEGAN6
		Start	After Merging & Trimming		rRNA Removed			non_rRNA remaining		Putative mRNA			Taxonomy			Function
Sample ID	NCBI SRA SRR(accession)*	initial reads	Merged & Prinseq trimmed reads		rRNA reads	% rRNA (removed)		non_rRNA reads		non_rRNA reads matched to RefSeq	% non_rRNA reads		Putative mRNA reads binning to Genera	% non_rRNA reads		Putative mRNA reads matching Interpro identities	% non_rRNA reads
SlowOx1	SRR5429570	13320934	13307909		783827	5.88993		12524082		2928905	23.3862		2231287	17.816		399565	3.19037
SlowOx2	SRR5429568	13671060	13664800		1086821	7.95344		12577979		5028637	39.9797		4049243	32.1931		951663	7.5661
SlowOx3	SRR5429566	13013905	13003963		742822	5.71227		12261141		2850967	23.2521		2148253	17.5208		370415	3.02105
FastOx1	SRR5429576	13165955	13150436		497456	3.78281		12652980		2452646	19.3839		1743322	13.778		314717	2.4873
FastOx2	SRR5429574	17363895	17355986		526297	3.03237		16829689		3984390	23.6748		2909991	17.2908		475067	2.82279
FastOx3	SRR5429572	14588475	14578208		500366	3.43229		14077842		2865960	20.3579		2126831	15.1076		499601	3.54885
* "NCBI SRA SRR(accession)" is the Sequence Read Run (SRR) accession number in the NCBI Sequence Read Archive (SRA) database containing raw paired-end sequences used in this study. Raw sequence data are available in the NCBI SRA database (https://www.ncbi.nlm.nih.gov/Traces/study/?acc=SRP103306); BioProject PRJNA381321.
